# Supplementary material for: Body mass index and risk of dying from a bloodstream infection: A Mendelian randomization study
Source: PubMed Central journal article supplement (PMC7668585; doi:10.1371/journal.pmed.1003413), 2020-11-16

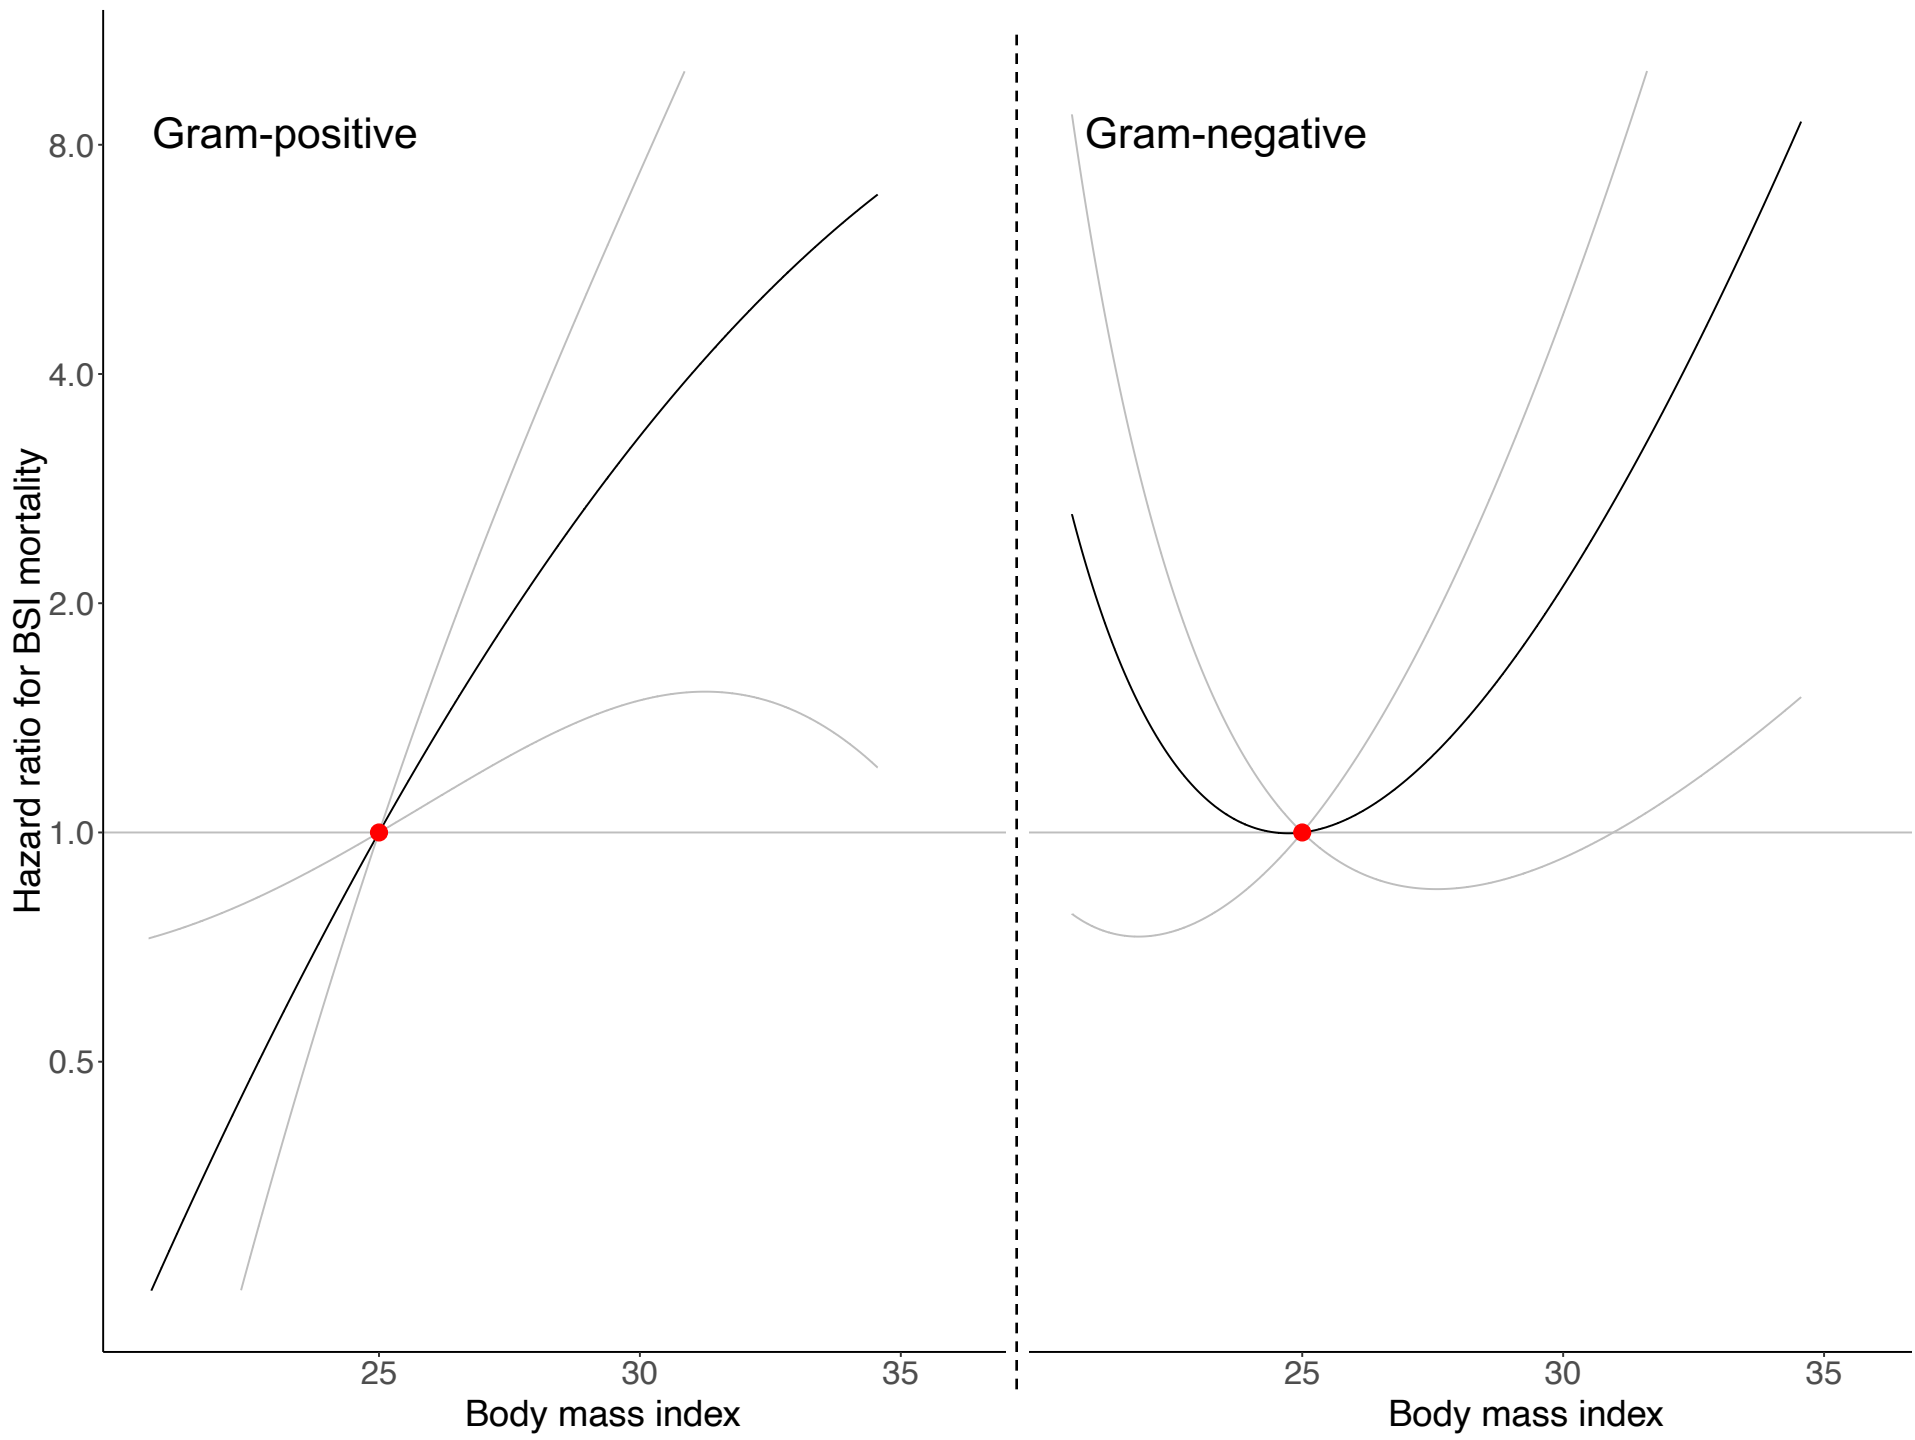

Supplement: pmed.1003413.s009.pdf [file pmed.1003413.s009.pdf]
